# Supplementary material
Source: publisher figshare collection journal article supplement (https://sage.figshare.com/ndownloader/files/18209300)
Supplement: Supplementary file 1 [file 18209300]

use "C:\Users\gpop\Google Drive\H_Legacy_Book\Left-Right Drafts\ECPR April 2017\RR\fig 5 religion intx data.dta"
label define nr	17"Model 1", replace
label define nr	16"Catholic respondent", add
label define nr	15"Protestant respondent", add
label define nr	14"Orthodox respondent", add
label define nr	13"Muslim respondent", add
label define nr	12"Model 2", add
label define nr	11"Regular churchgoer", add
label define nr	10"No/irregular churchgoer", add
label define nr	9"Model 3", add
label define nr	8"Catholic churchgoer", add
label define nr	7"Protestant churchgoer", add
label define nr	6"Orthodox churchgoer", add
label define nr	5"Muslim mosquegoer", add
label define nr	4"Catholic - other", add
label define nr	3"Protestant - other", add
label define nr	2"Orthodox - other", add
label define nr	1"Muslim - other", add

label values nr nr

twoway (rcap p5_leftauth p95_leftauth nr, hor) ///
	(scatter nr est_leftauth), ///
	yscale(range(0.5 17.5)) ylabel(1 2 3 4 5 6 7 8 9 10 11 12 13 14 15 16 17, valuelabel labsize(small) angle(0)) ytitle("") ///
		xscale(range(0 .005)) xlabel( 0 "0" .001 ".001" .002 ".002" .003 ".003" .004 ".004" , labsize(small) ) xtitle("Communist exposure effects on left-authoritarian probability", justification(right)) ///
	xline(0, lpattern(shortdash)) legend(off) title("Fig.5: Communist Exposure and Left-Authoritarian Orientation: Religion as a Moderator", span size(medsmall)) scheme(s2mono)
graph save Graph "C:\Users\gpop\Google Drive\H_Legacy_Book\Left-Right Drafts\ECPR April 2017\RR\Fig 5 religion moderator CPS Feb 2019.gph", replace 
